# Supplementary material
Source: publisher figshare collection journal article supplement (https://acs.figshare.com/ndownloader/files/4026691)

## Supporting Information

### **A Simple Methodology for the Aerobic N-methylation of Substituted Anilines and Aminophenols Catalyzed by Zirconium Oxychloride Octahydrate, $\text{ZrOCl}_2 \cdot 8\text{H}_2\text{O}$**

Reza Tayebbe, <sup>a,\*</sup> Esmail Rezaei Seresht, <sup>a</sup> Fariba Jafari, <sup>b</sup> Sima Rabiee<sup>c</sup>

<sup>a</sup>Department of Chemistry, School of Sciences, Hakim Sabzevari University, Sabzevar, 96179-76487, Iran

<sup>b</sup>Department of Chemistry, Payam e Noor University, Branch of Jovein, Sabzevar, Iran

<sup>c</sup>Department of Chemical Engineering, Sharif University of Technology, Tehran, Iran

---

\* Corresponding author: Reza Tayebbe, Tel:+98-571-4410310 ; Fax: +98-571-4410300; Email: Rtayebbe@yahoo.com.

## List of Tables

**Table S1. Reaction of aniline with DMC in presence of different amounts of  $\text{ZrOCl}_2 \cdot 8\text{H}_2\text{O}$ .<sup>a</sup>**

| Entry | Catalyst | Catalyst | Conv. (%) | Selectivity (%) |    |                |
|-------|----------|----------|-----------|-----------------|----|----------------|
|       | (mol%)   | (mg)     |           | Methylation     |    | Carbamoylation |
|       |          |          |           | Mono            | Di |                |
| 1     | -        | -        | 5         | 100             | -  | -              |
| 2     | 1        | 14       | 8         | 100             | -  | -              |
| 3     | 5        | 72       | 20        | 90              | 10 | -              |
| 4     | 10       | 144      | 35        | 66              | 32 | 2              |
| 5     | 20       | 288      | 61        | 63              | 24 | 13             |
| 6     | 22       | 316      | 65        | 62              | 23 | 15             |
| 7     | 25       | 360      | 74        | 55              | 25 | 20             |

<sup>a</sup>Reaction conditions: aniline(4.5 mmol), DMC (24 mmol), and catalyst were stirred in a sample tube at 90°C for 22 h.

**Table S2. Effect of aniline:DMC molar ratio on the conversion of aniline<sup>a</sup>.**

| Entry | Aniline:DMC<br>molar ratio | Conv. (%) | Selectivity (%) |    |                |
|-------|----------------------------|-----------|-----------------|----|----------------|
|       |                            |           | Methylation     |    | Carbamoylation |
|       |                            |           | Mono            | Di |                |
| 1     | 1:0.5                      | 45        | 63              | 27 | 10             |
| 2     | 1:1                        | 58        | 61              | 25 | 14             |
| 3     | 1:2                        | 68        | 59              | 23 | 18             |
| 4     | 1:5                        | 74        | 55              | 25 | 20             |
| 5     | 1:10                       | 72        | 56              | 25 | 19             |
| 6     | 1:20                       | 70        | 57              | 25 | 18             |

<sup>a</sup>Reaction conditions: aniline, DMC, and catalyst(360mg) were stirred in a sample tube at 90°C for 22 h.

**Table S3. Effect of temperature on the conversion of aniline<sup>a</sup>.**

| Entry | Temperature (°C) | Conv. (%) | Selectivity (%) |    |                |
|-------|------------------|-----------|-----------------|----|----------------|
|       |                  |           | Methylation     |    | Carbamoylation |
|       |                  |           | Mono            | Di |                |
| 1     | 40               | 0         | -               | -  | -              |
| 2     | 50               | 7         | 100             | -  | -              |
| 3     | 70               | 20        | 90              | 10 | -              |
| 4     | 80               | 53        | 64              | 23 | 13             |
| 5     | 90               | 74        | 55              | 25 | 20             |

<sup>a</sup>Reaction conditions: aniline (4.5 mmol), DMC (24 mmol), and catalyst (360mg) were stirred in a sample tube for 22 h.

## List of FT-IR and $^1\text{H}$ -NMR spectra

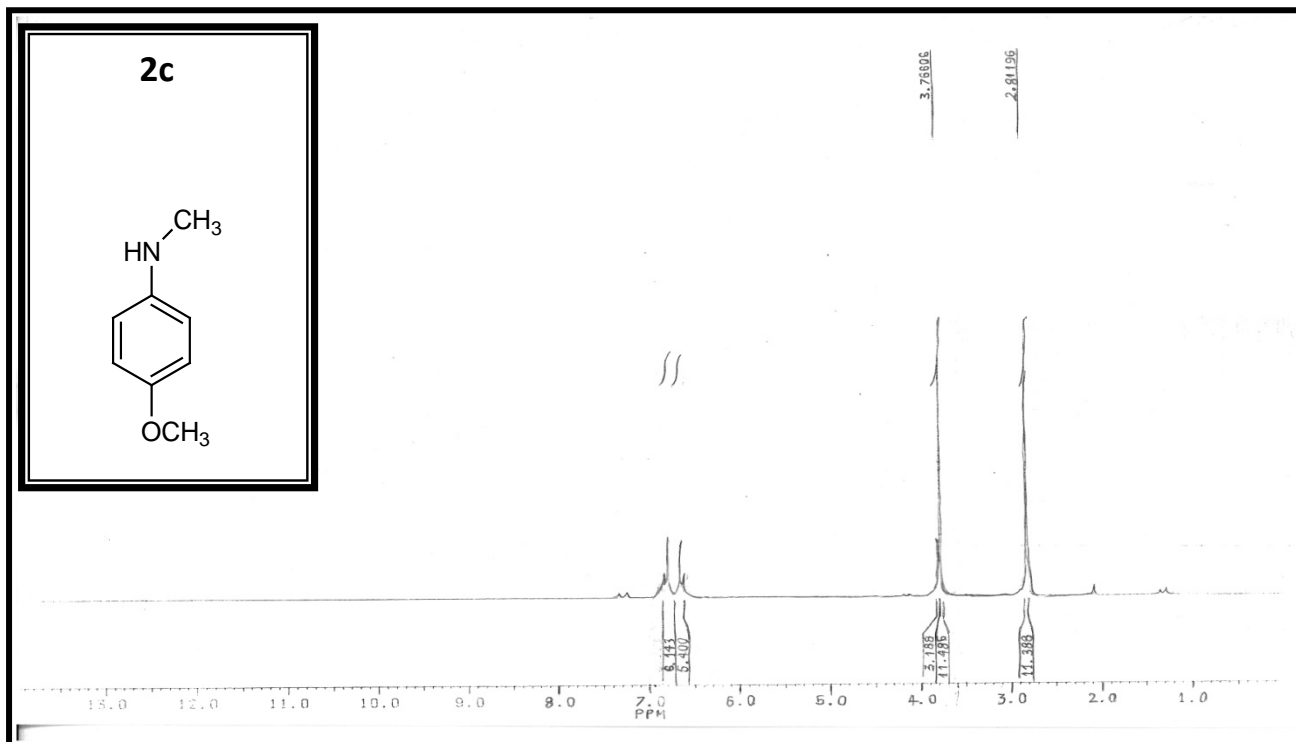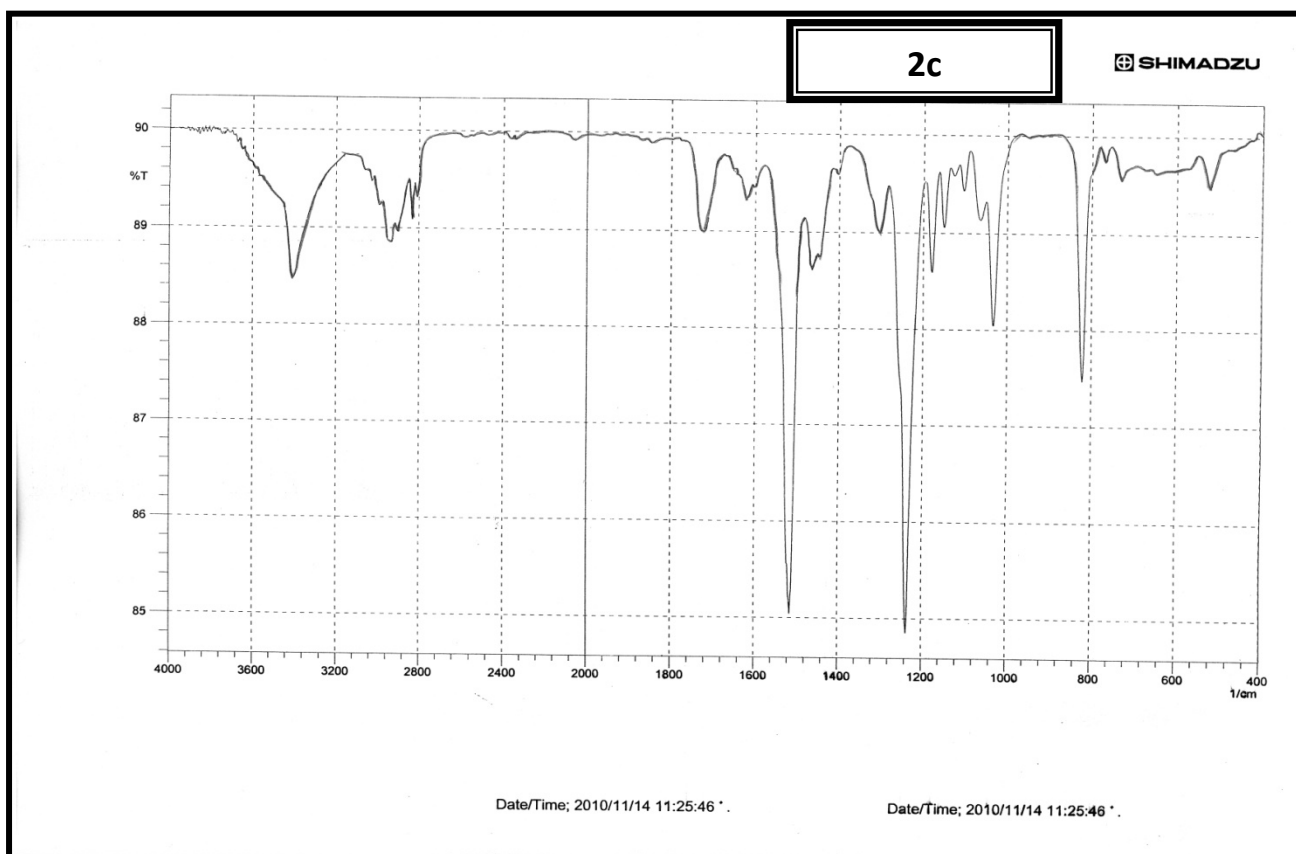

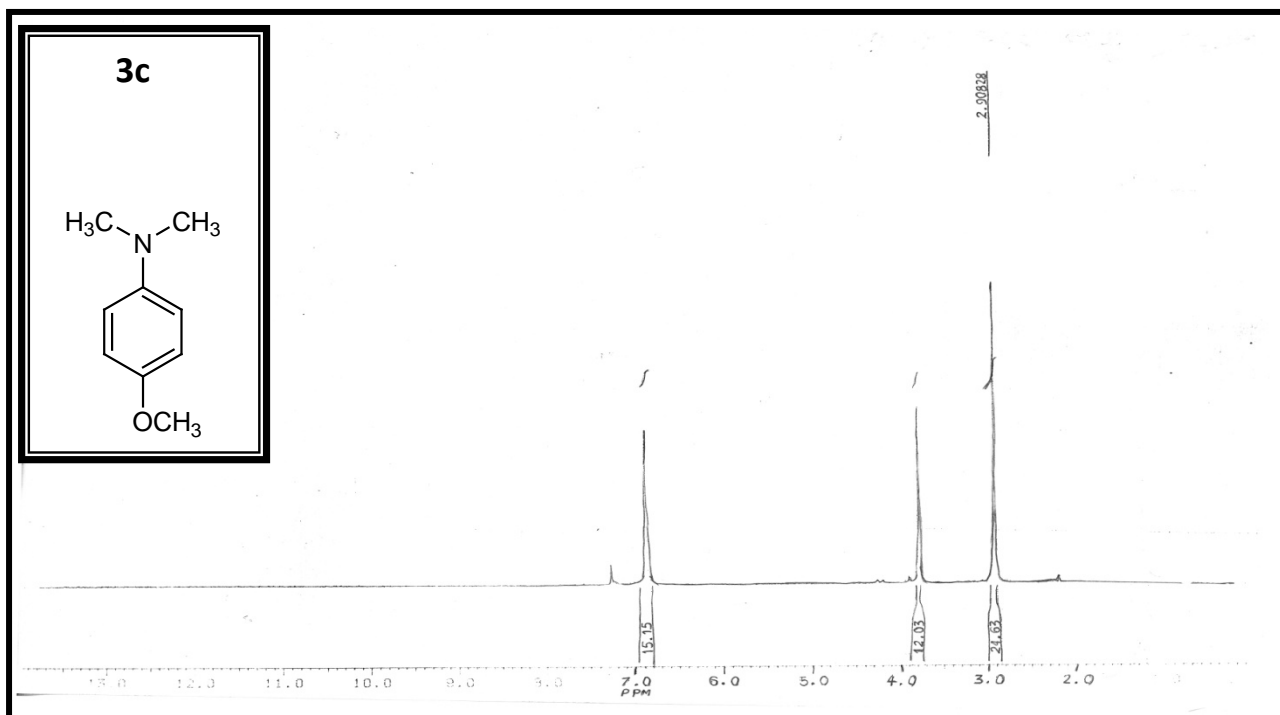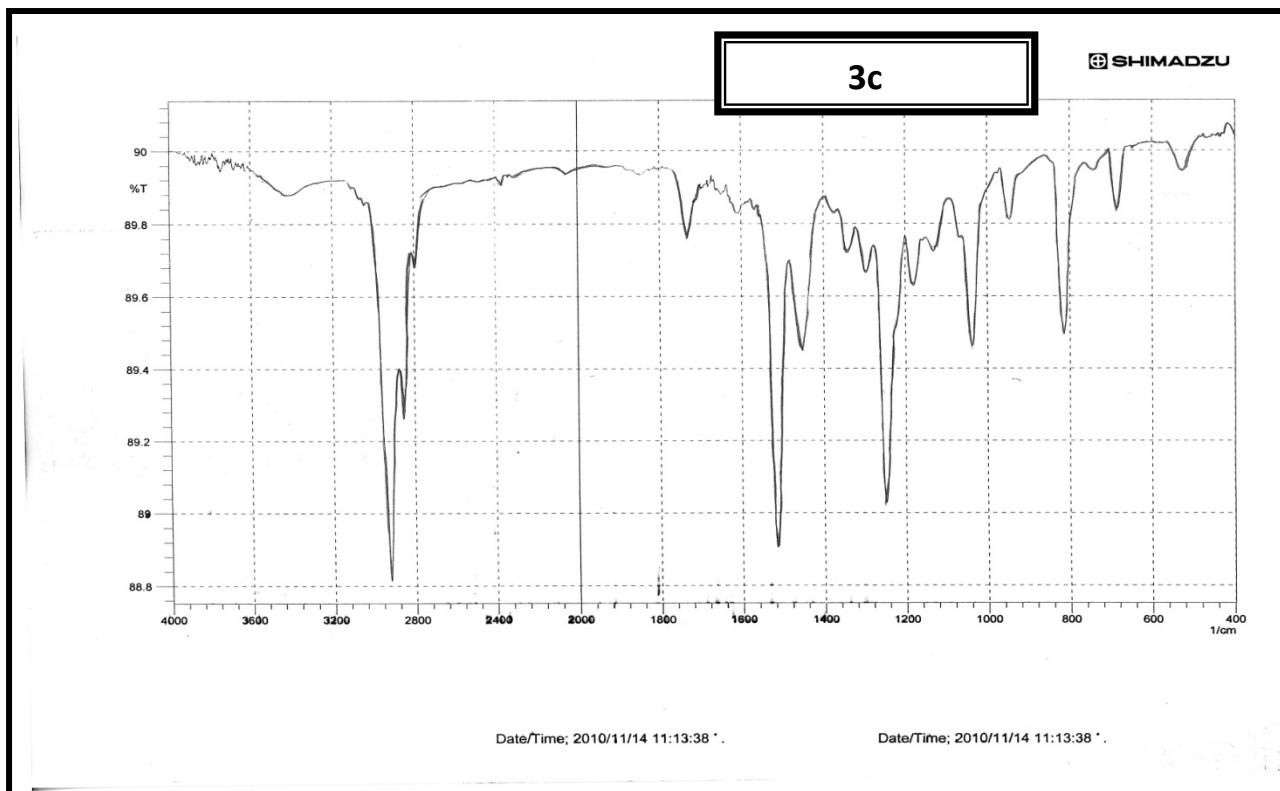



**2d**

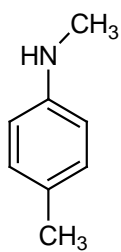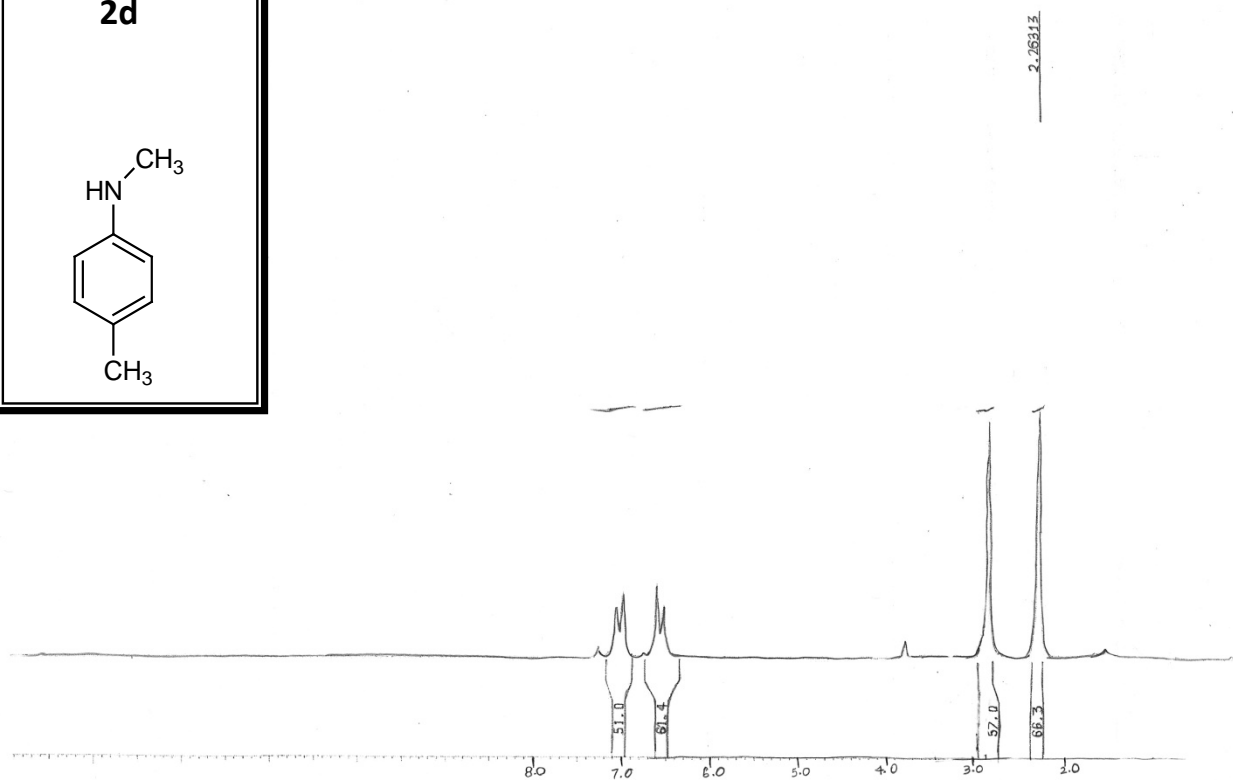

**2d**

SHIMADZU

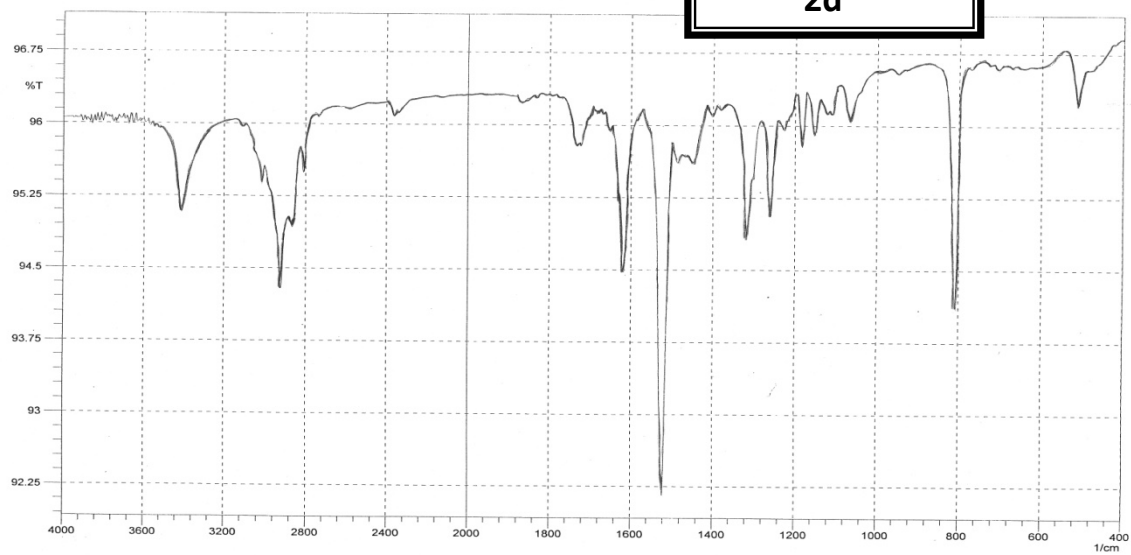

Date/Time; 2010/10/18 12:38:23 ㄹ

Date/Time; 2010/10/18 12:38:23 ㄹ

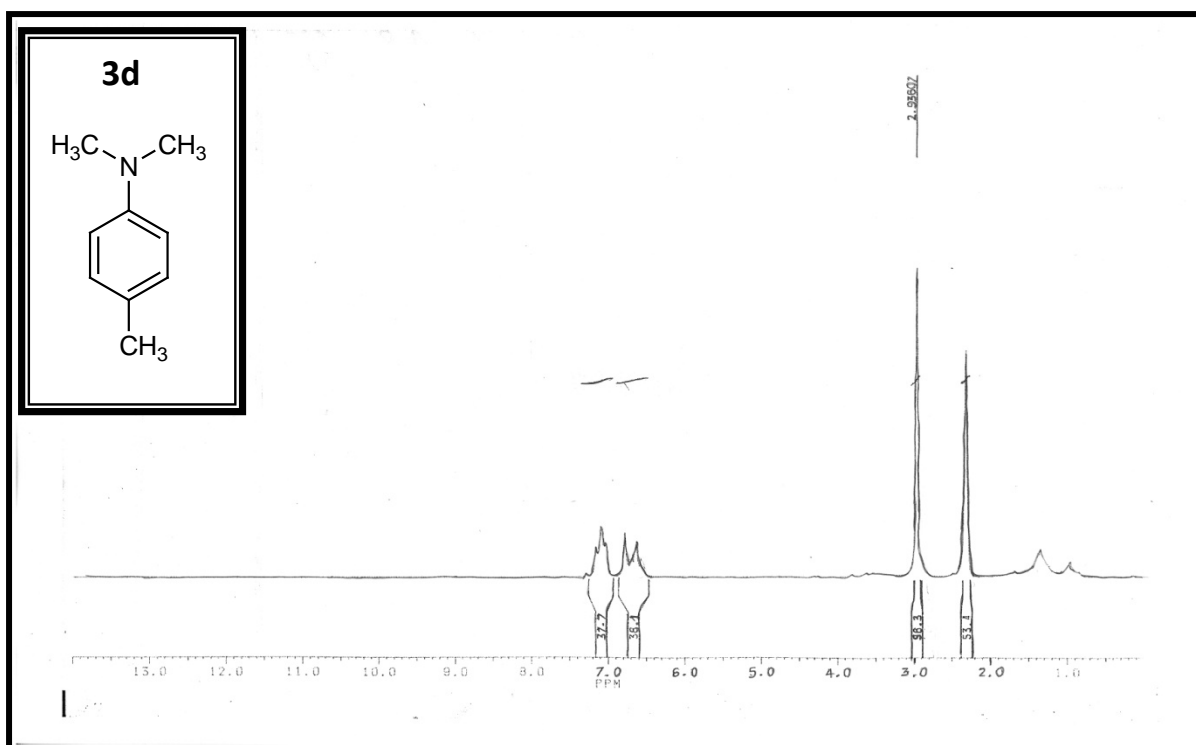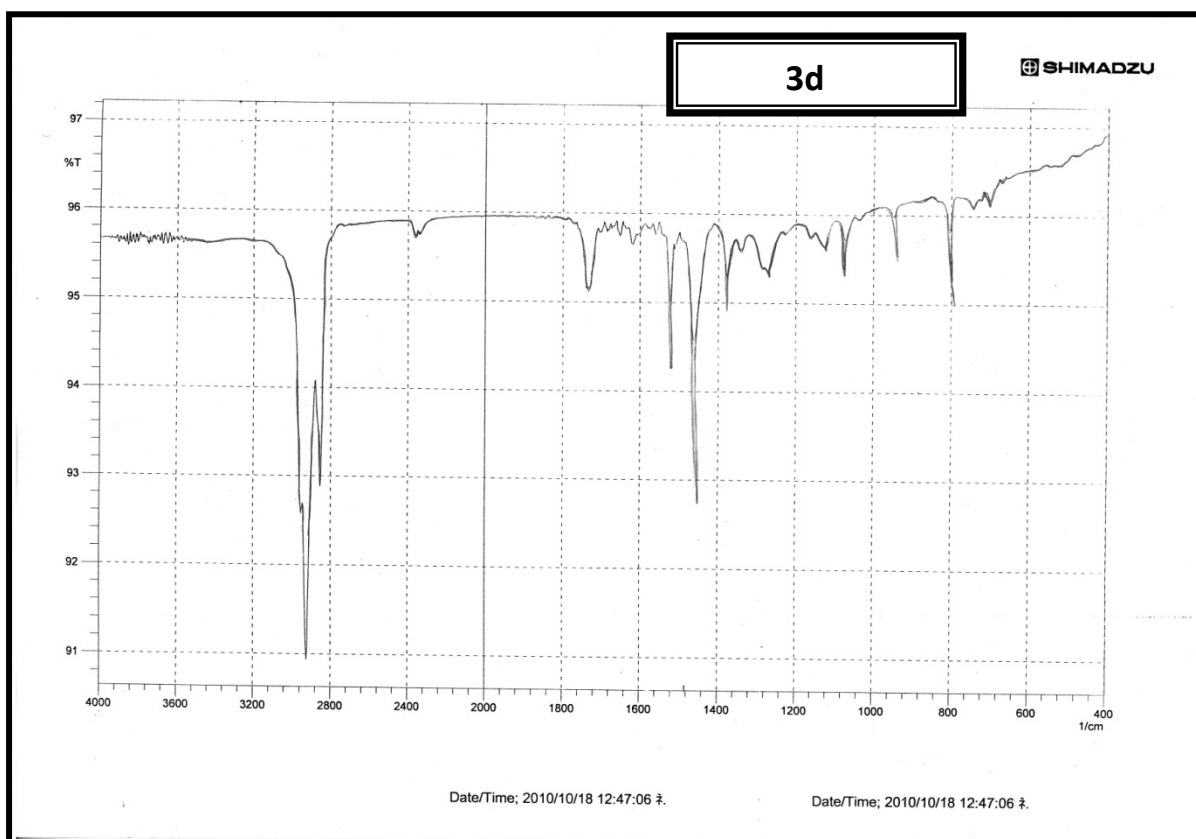



4d

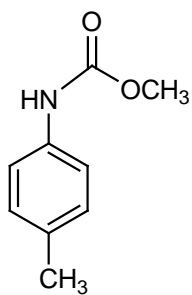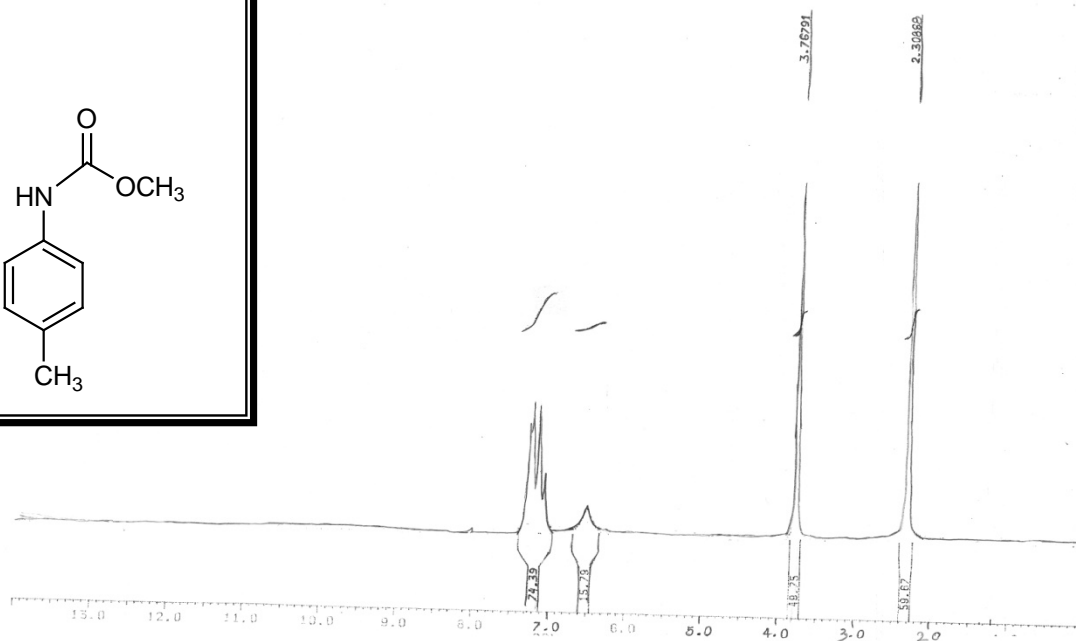

2e

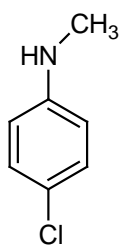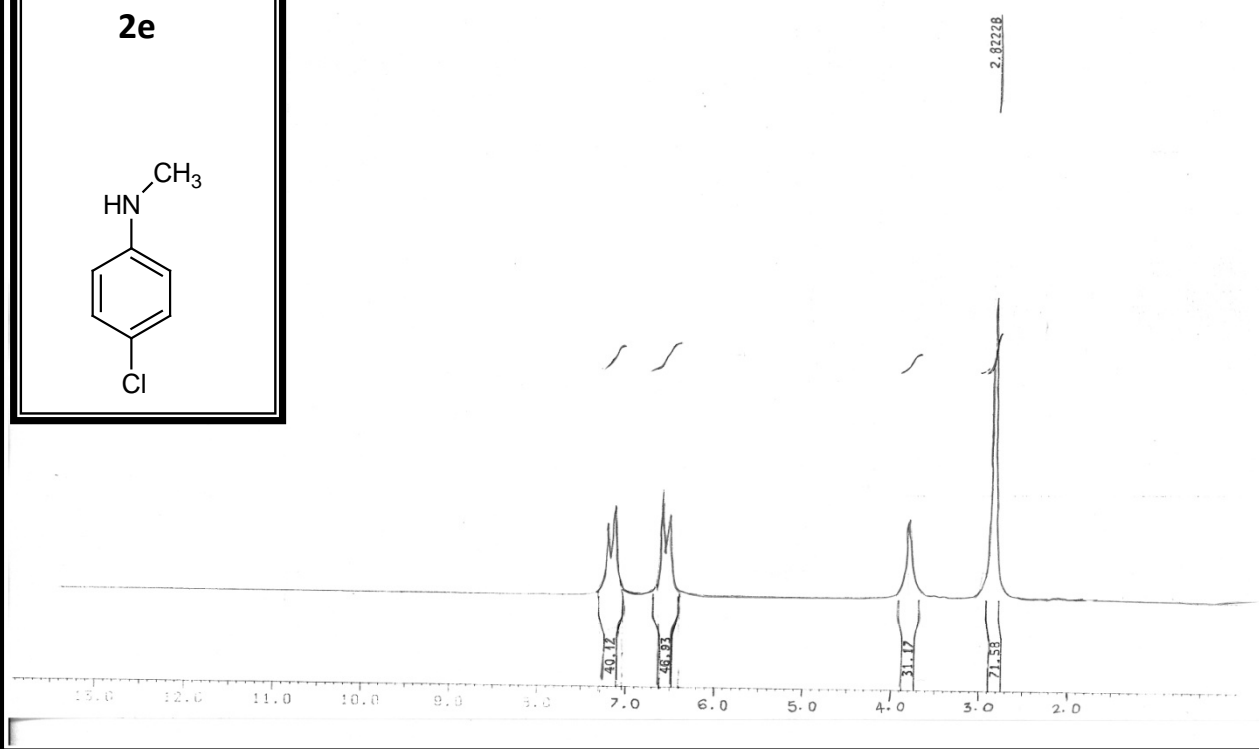

2e

SHIMADZU

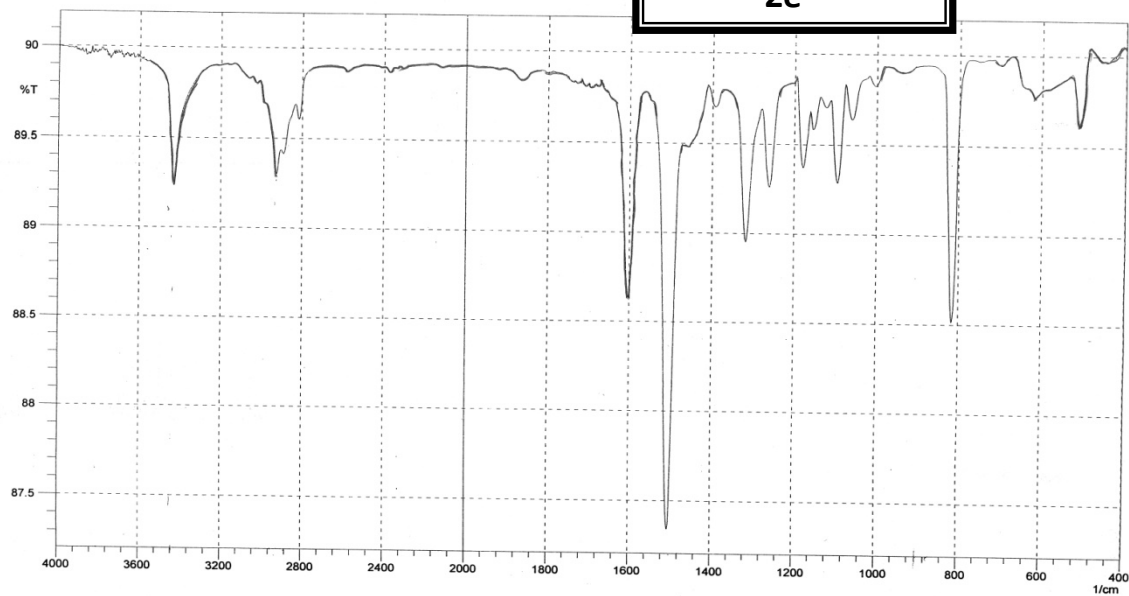

Date/Time; 2010/11/14 11:21:21 .

Date/Time; 2010/11/14 11:21:21 .

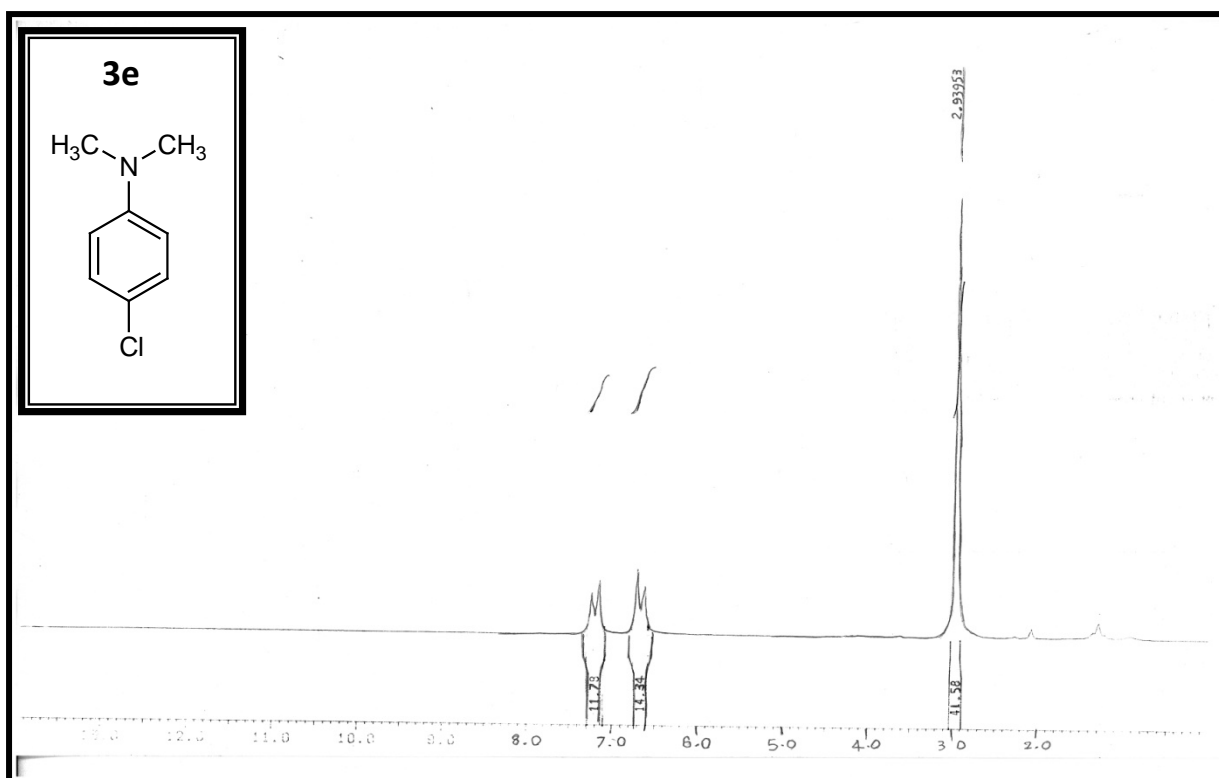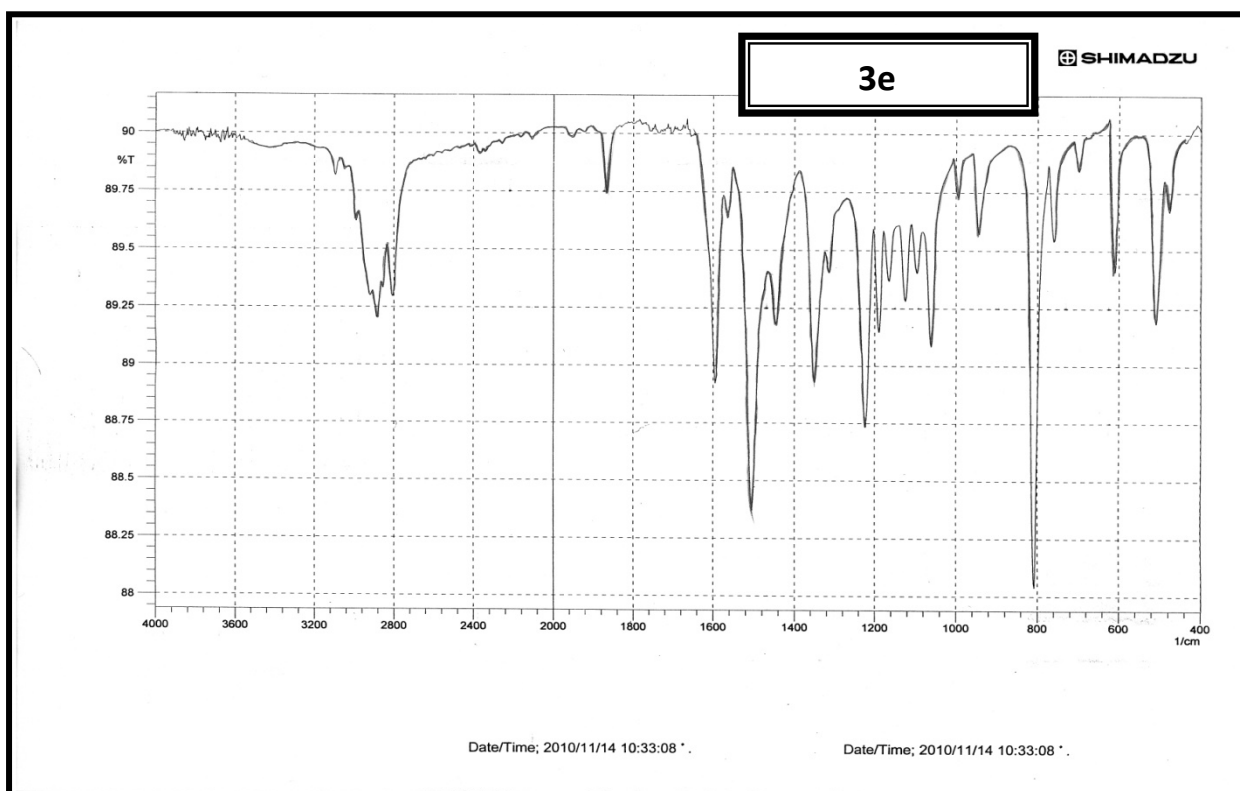

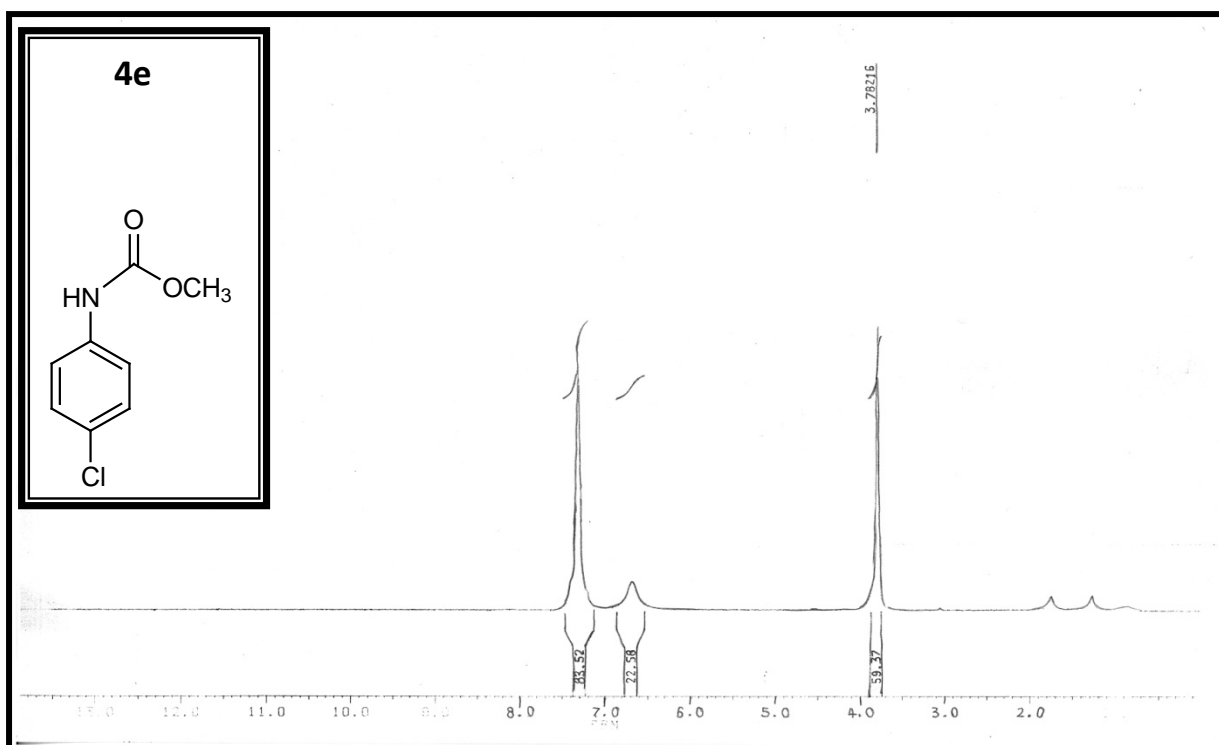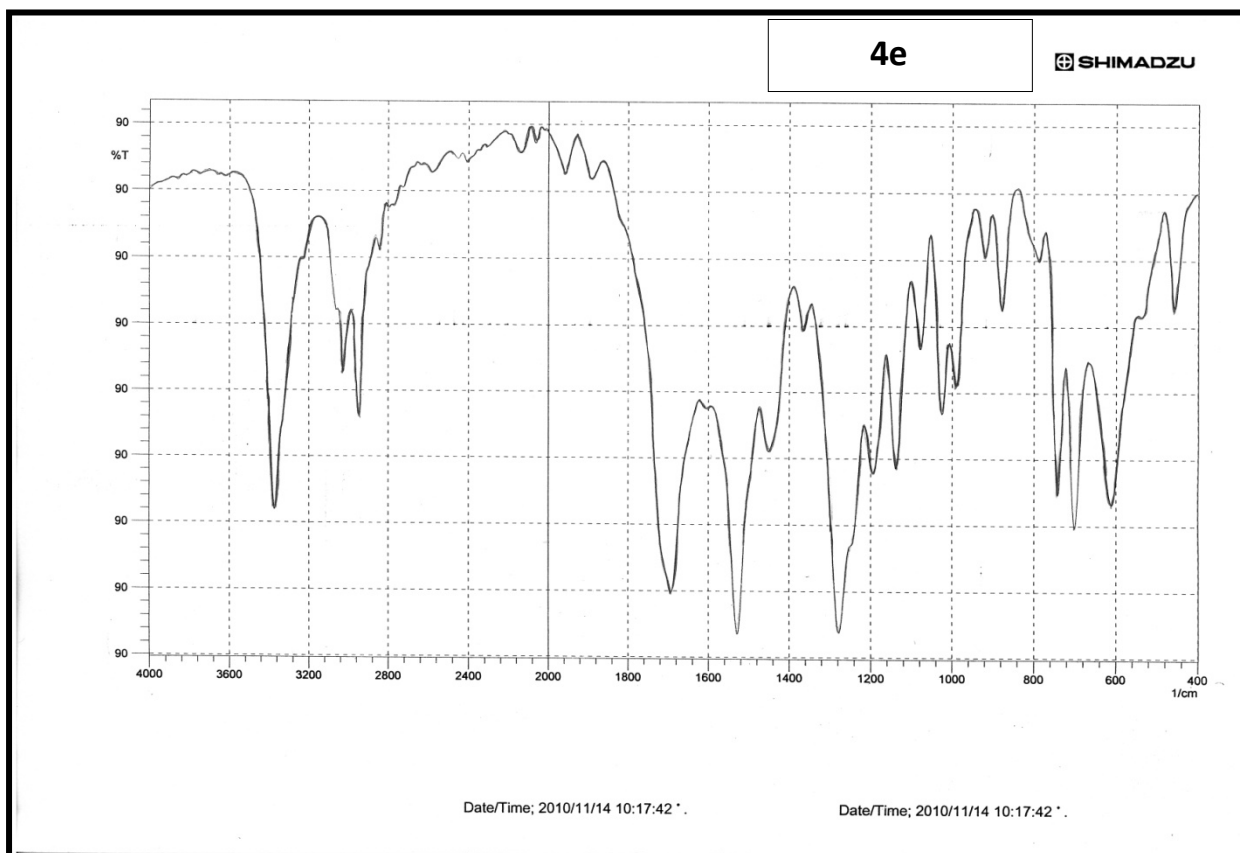

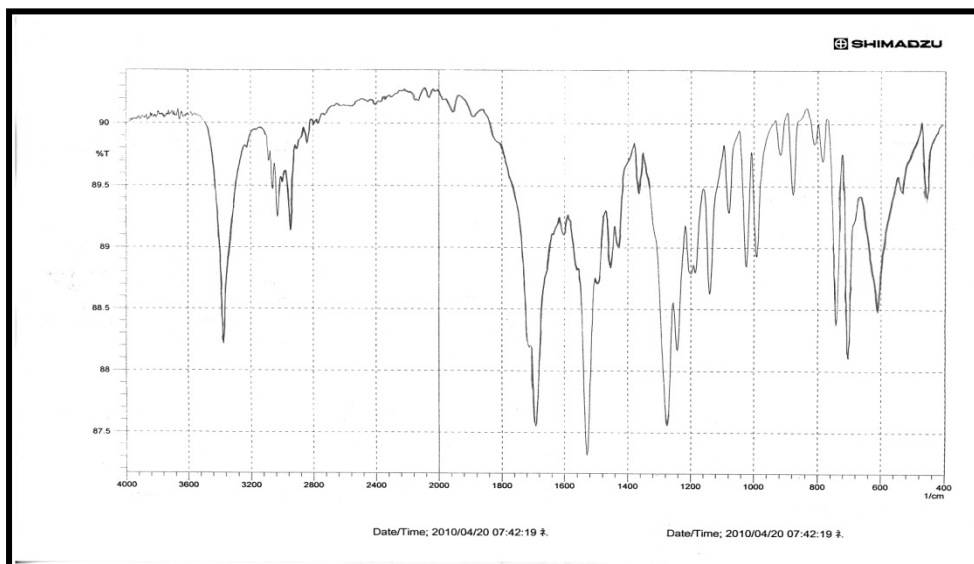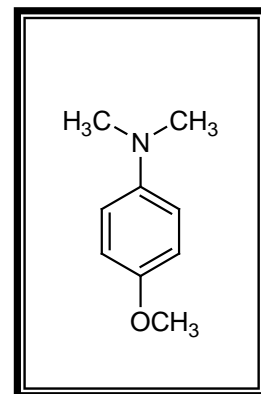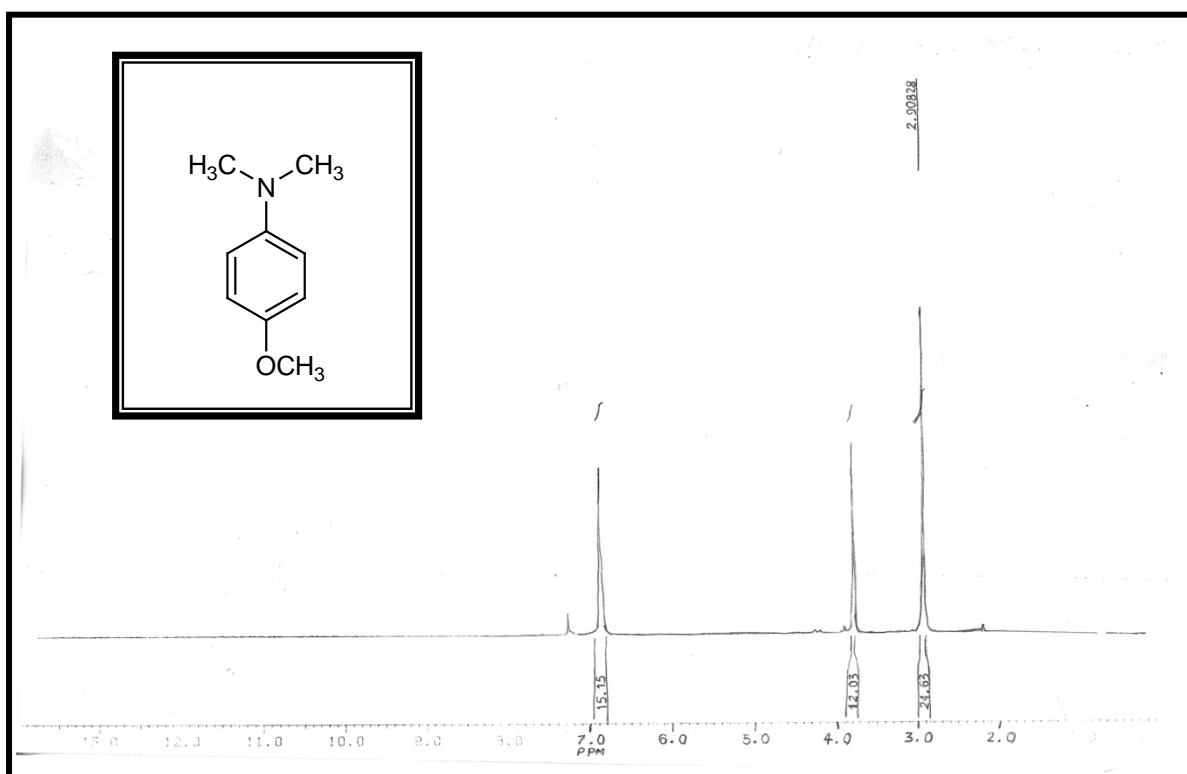

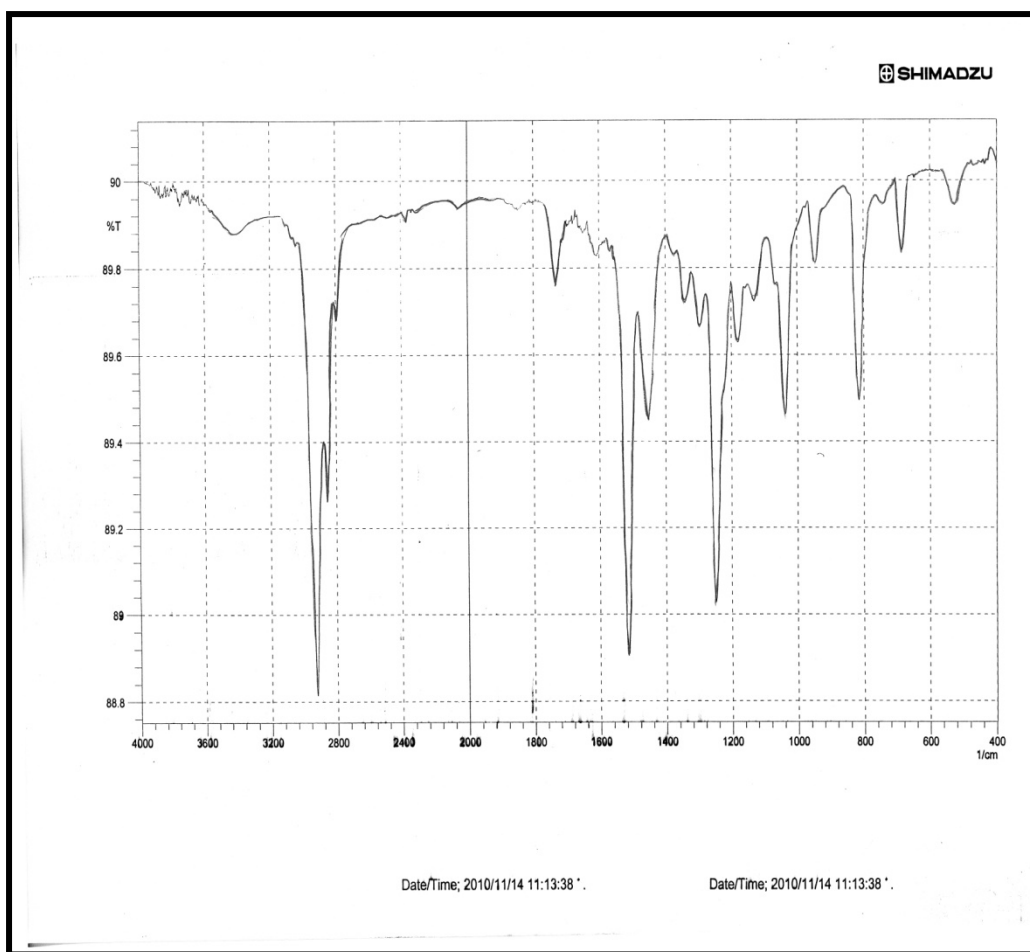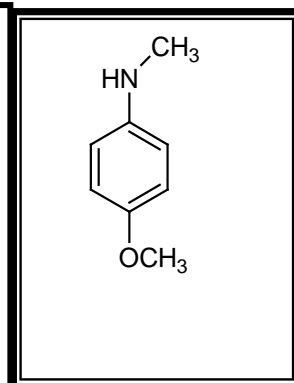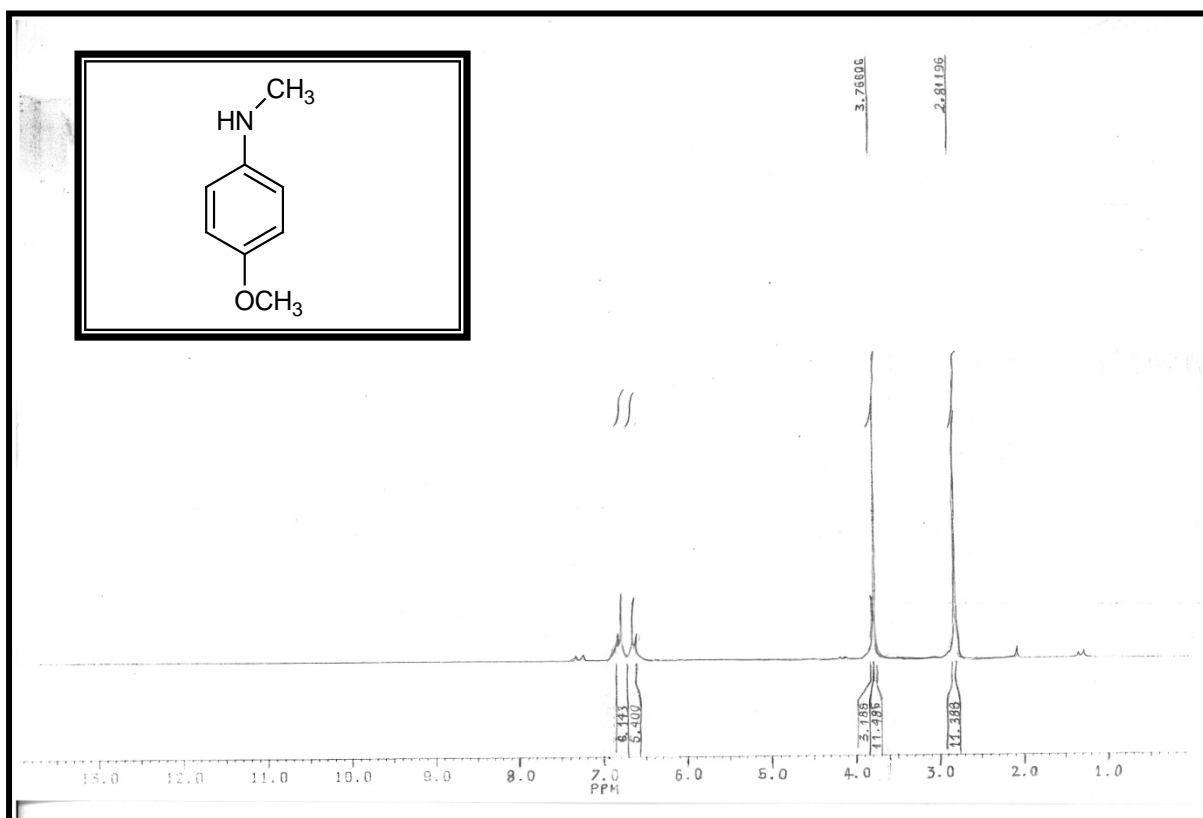

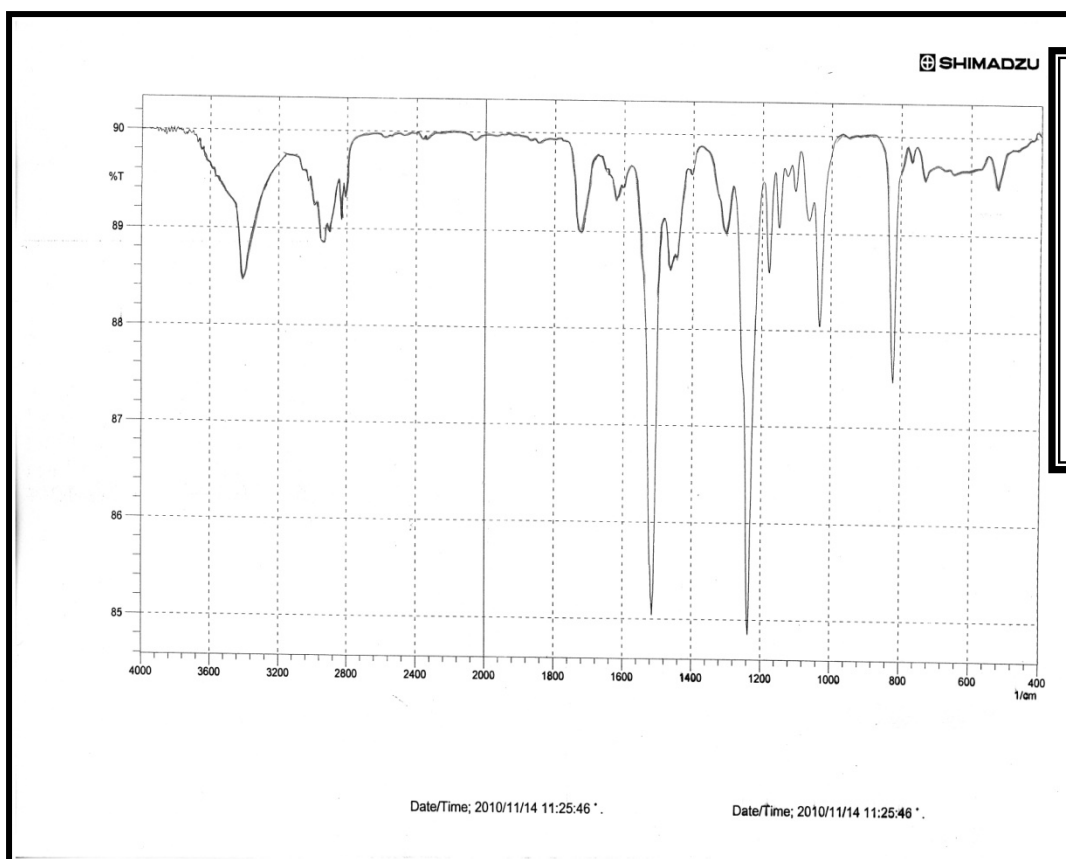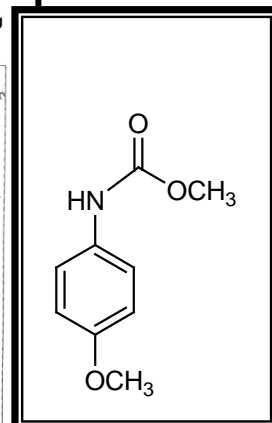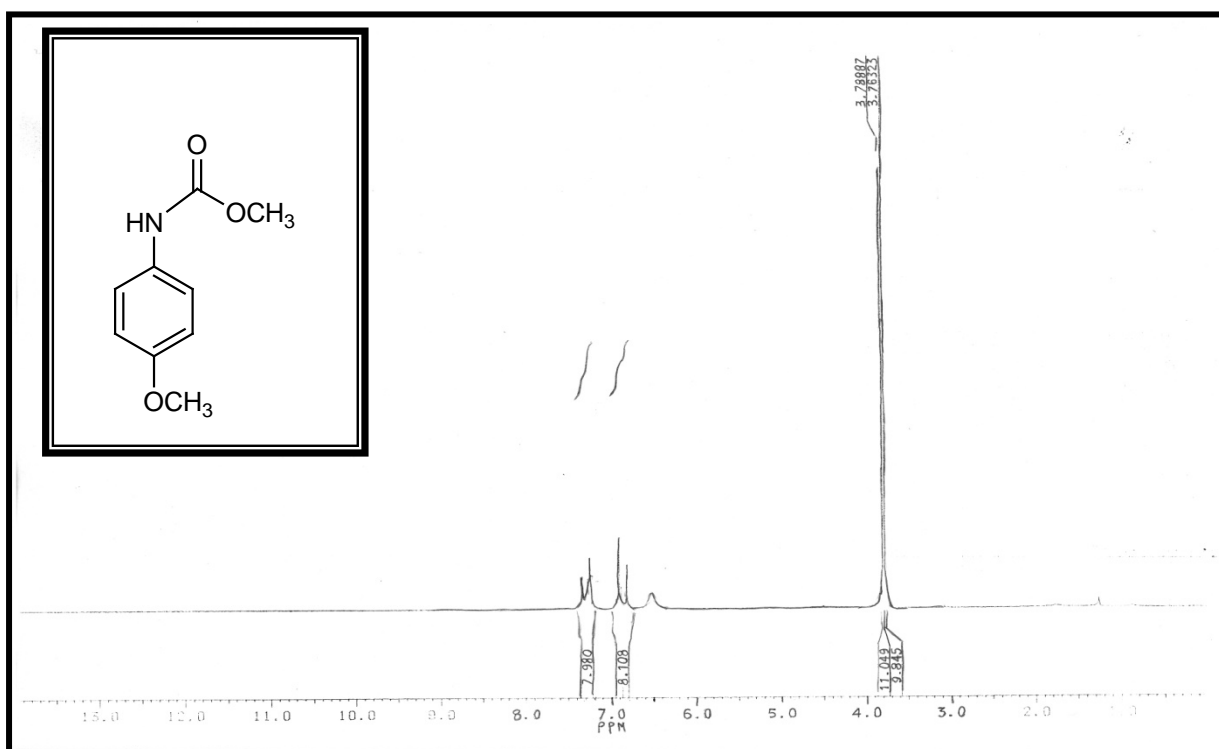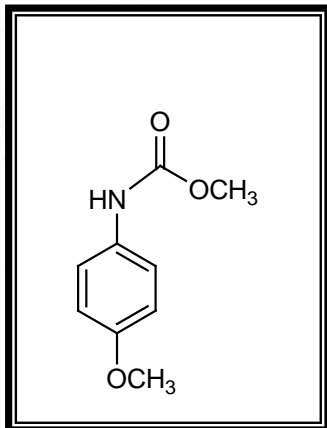

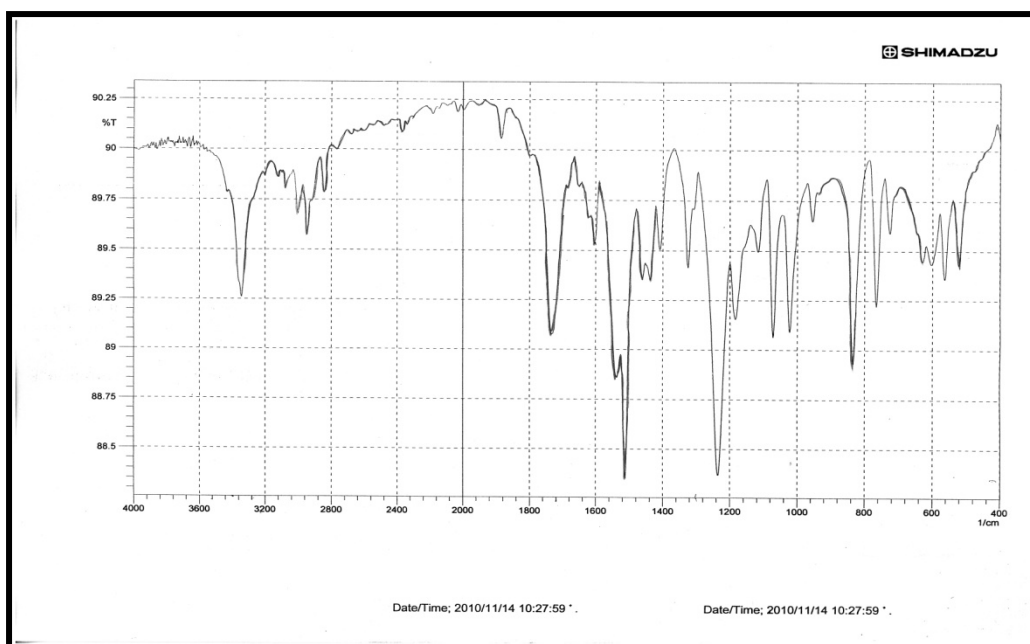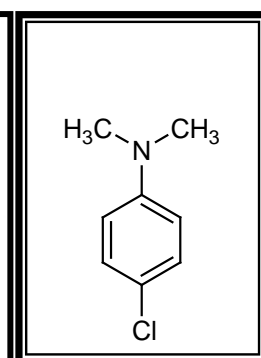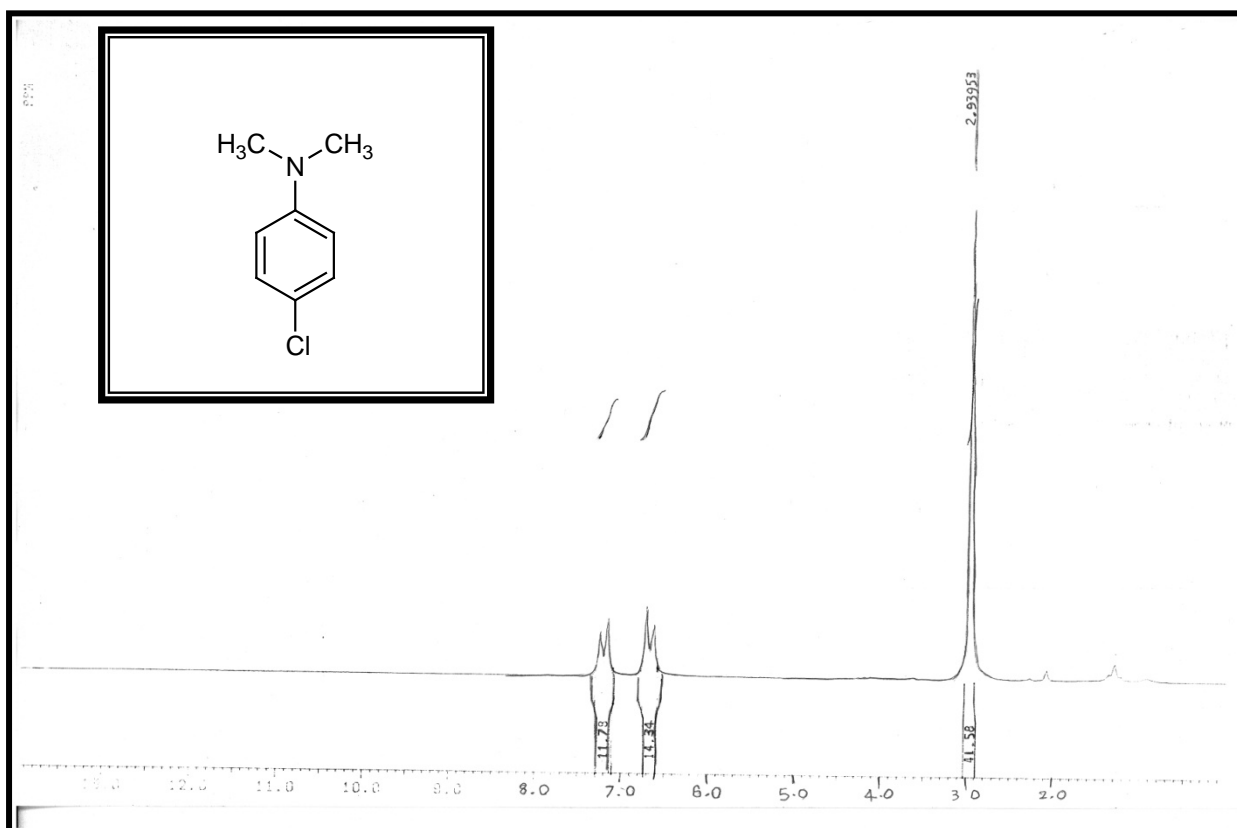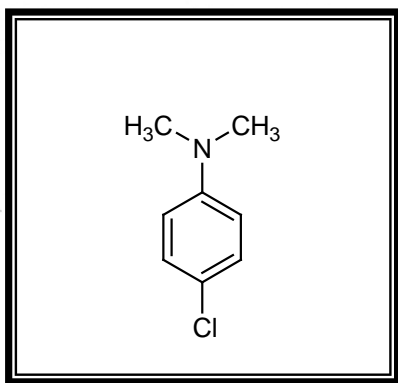



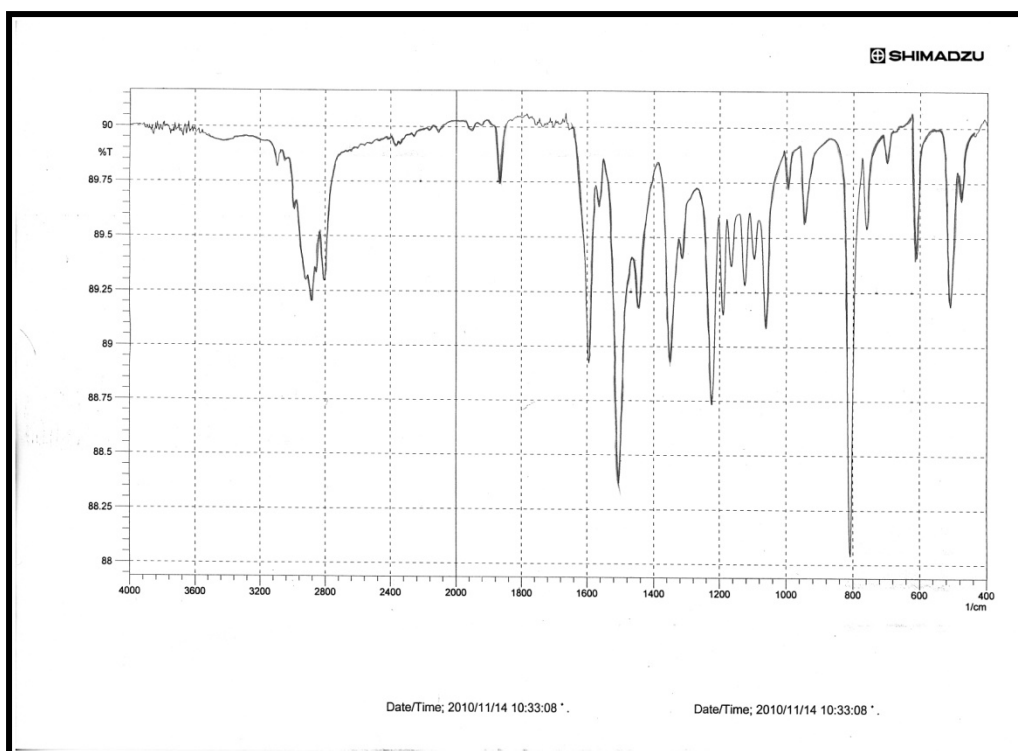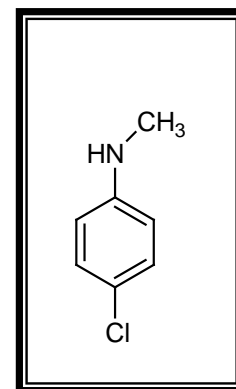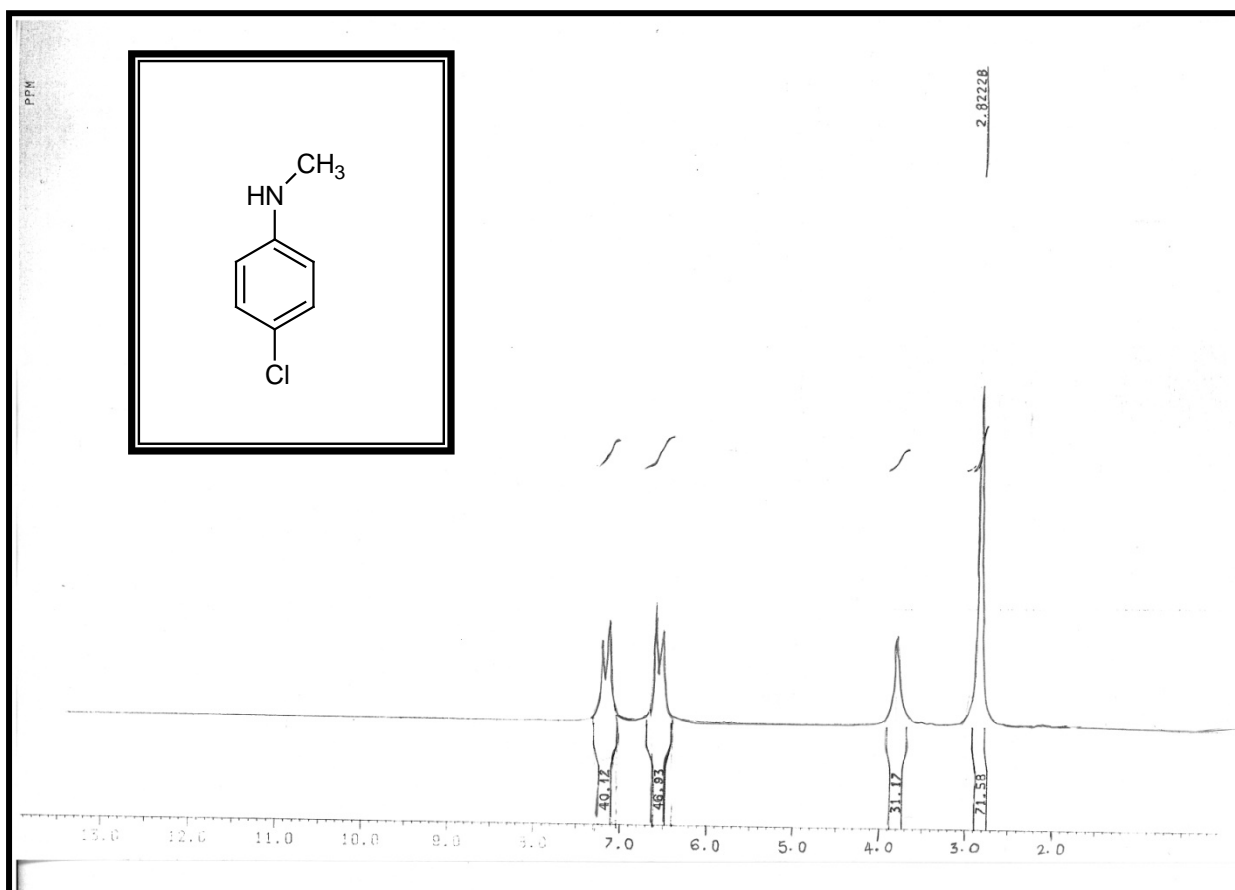

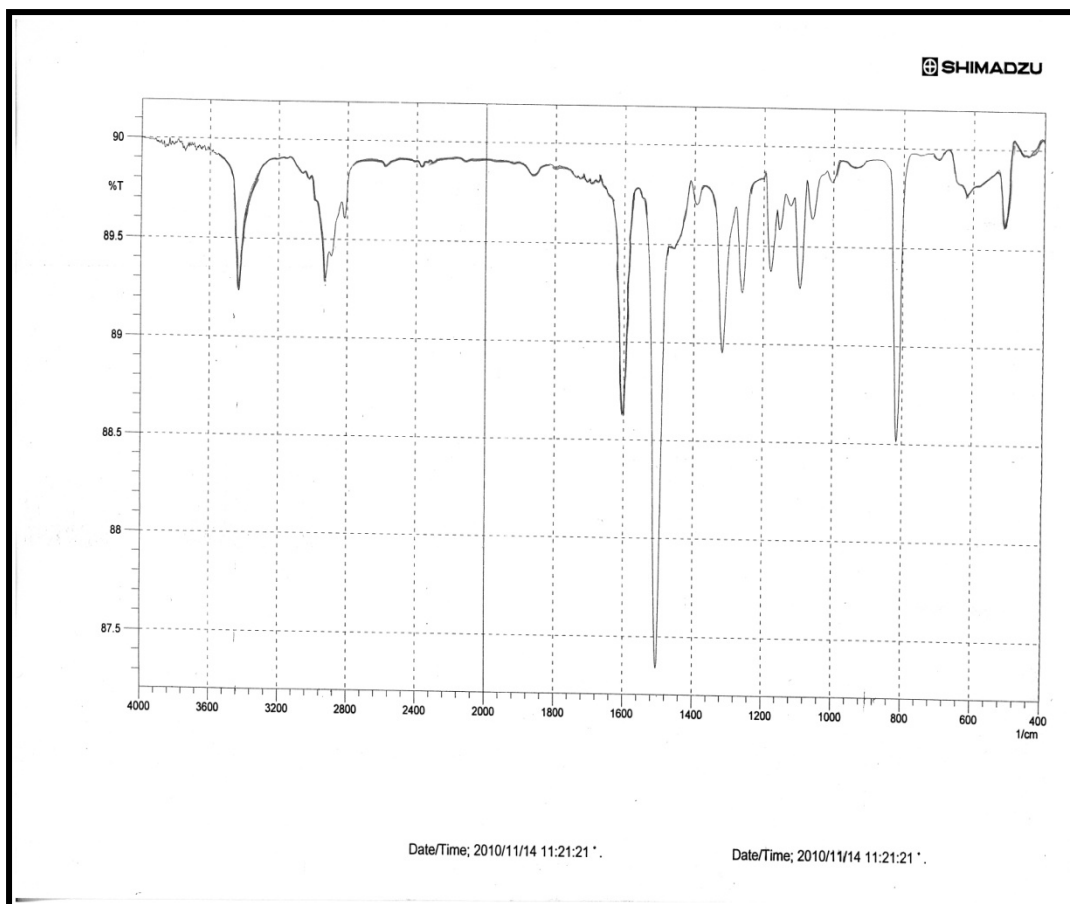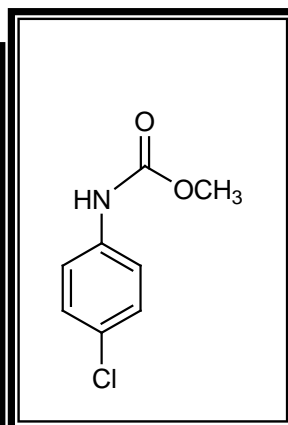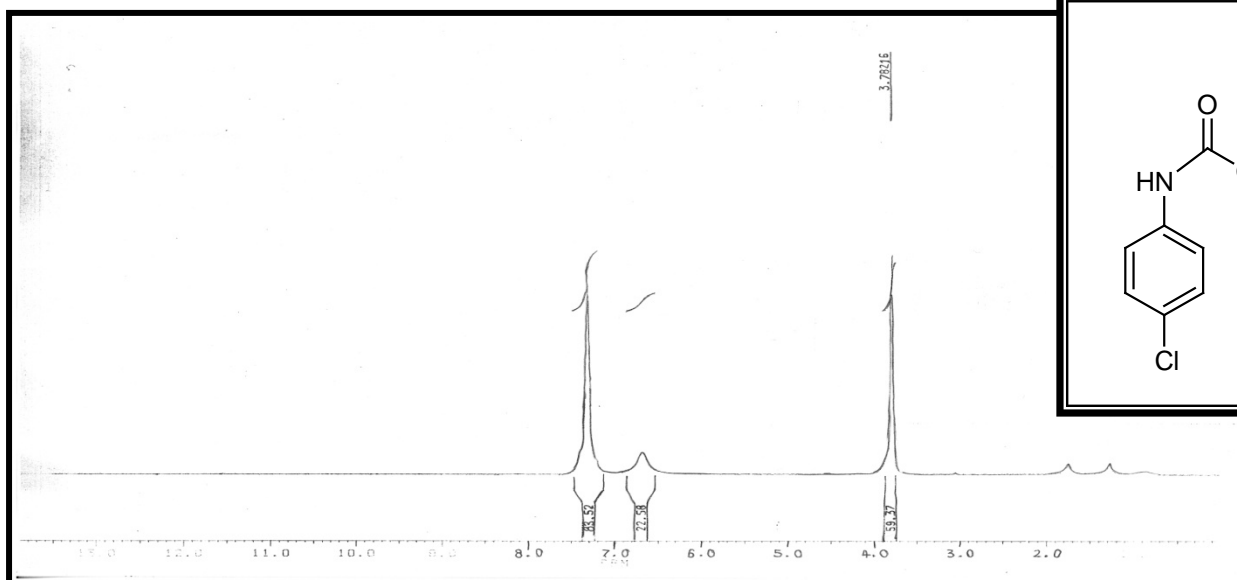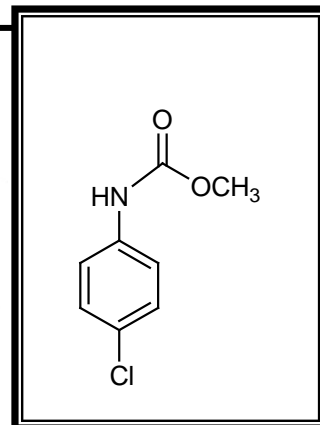

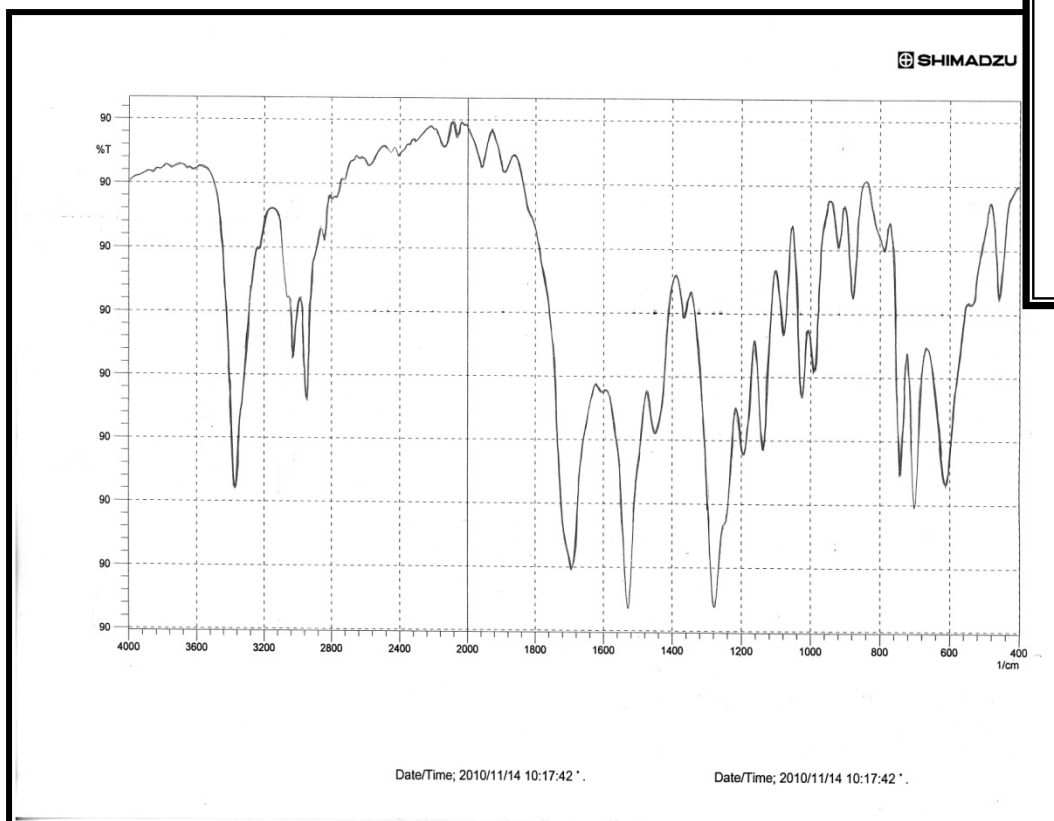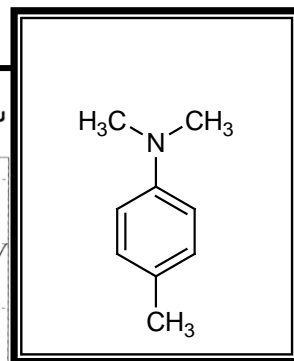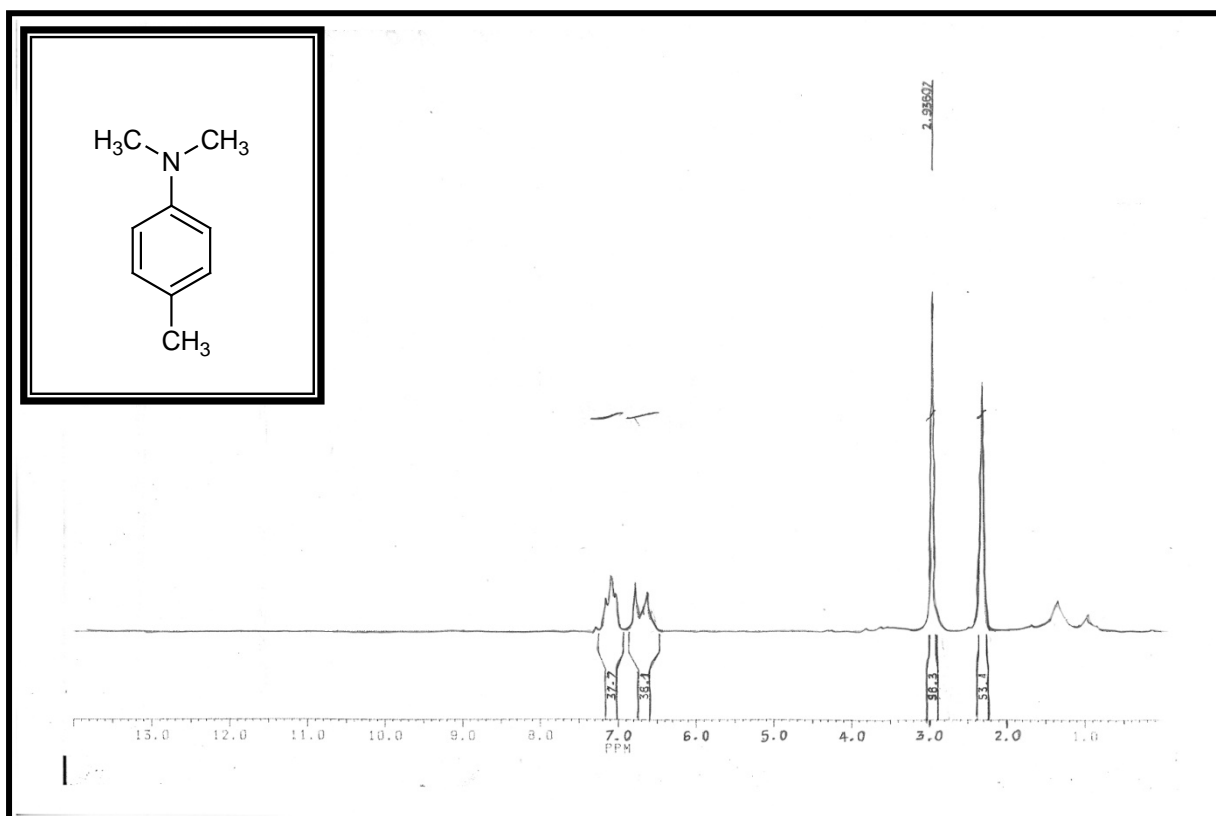

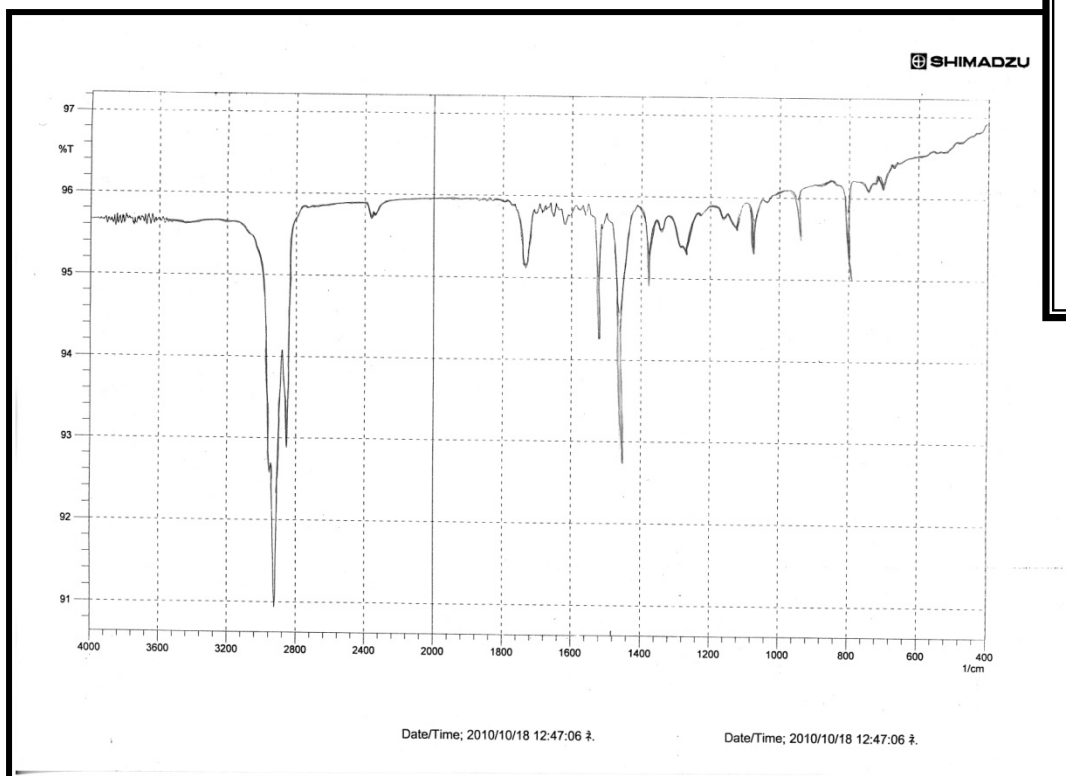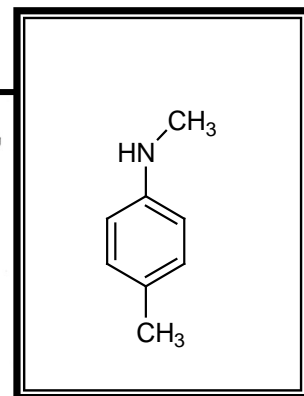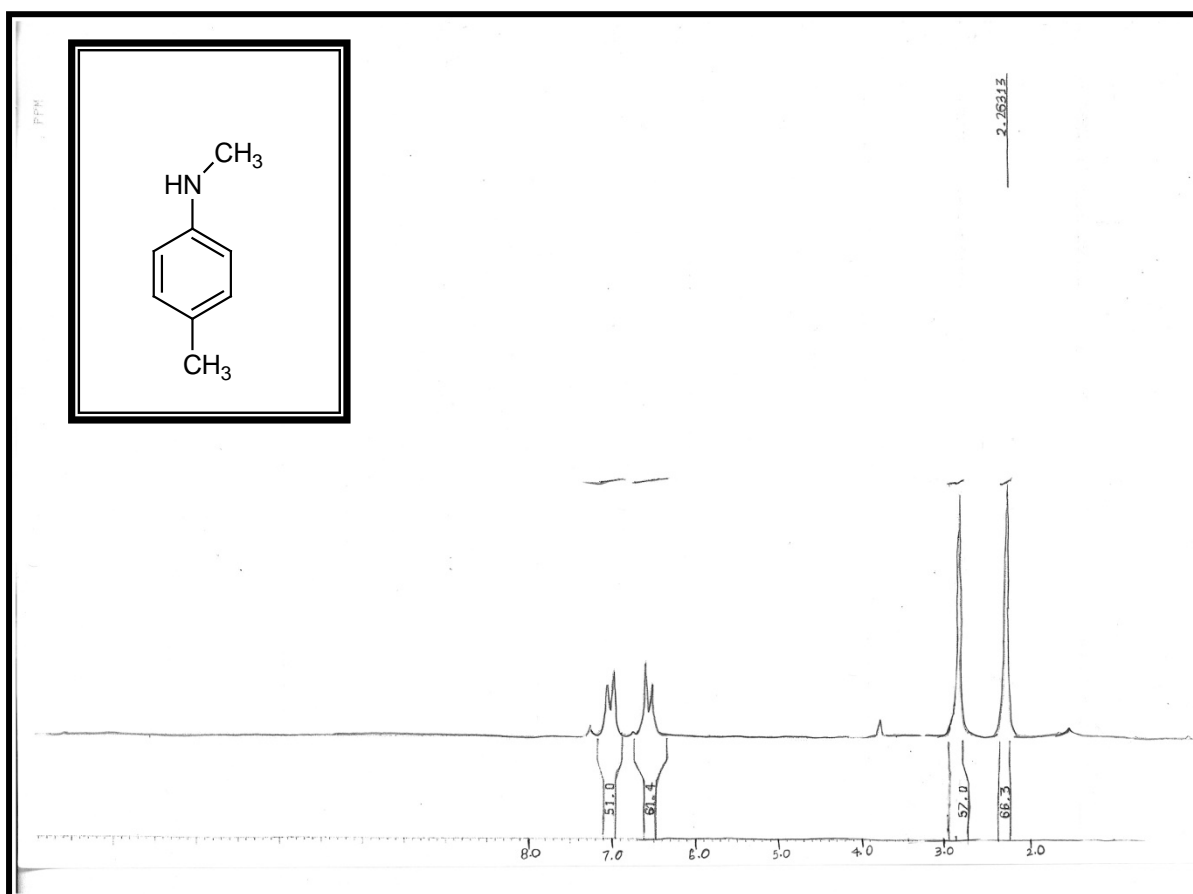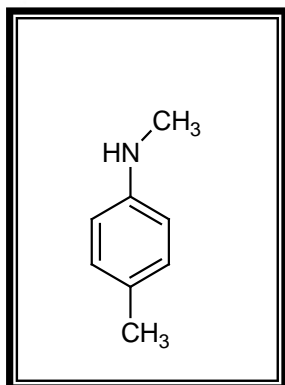

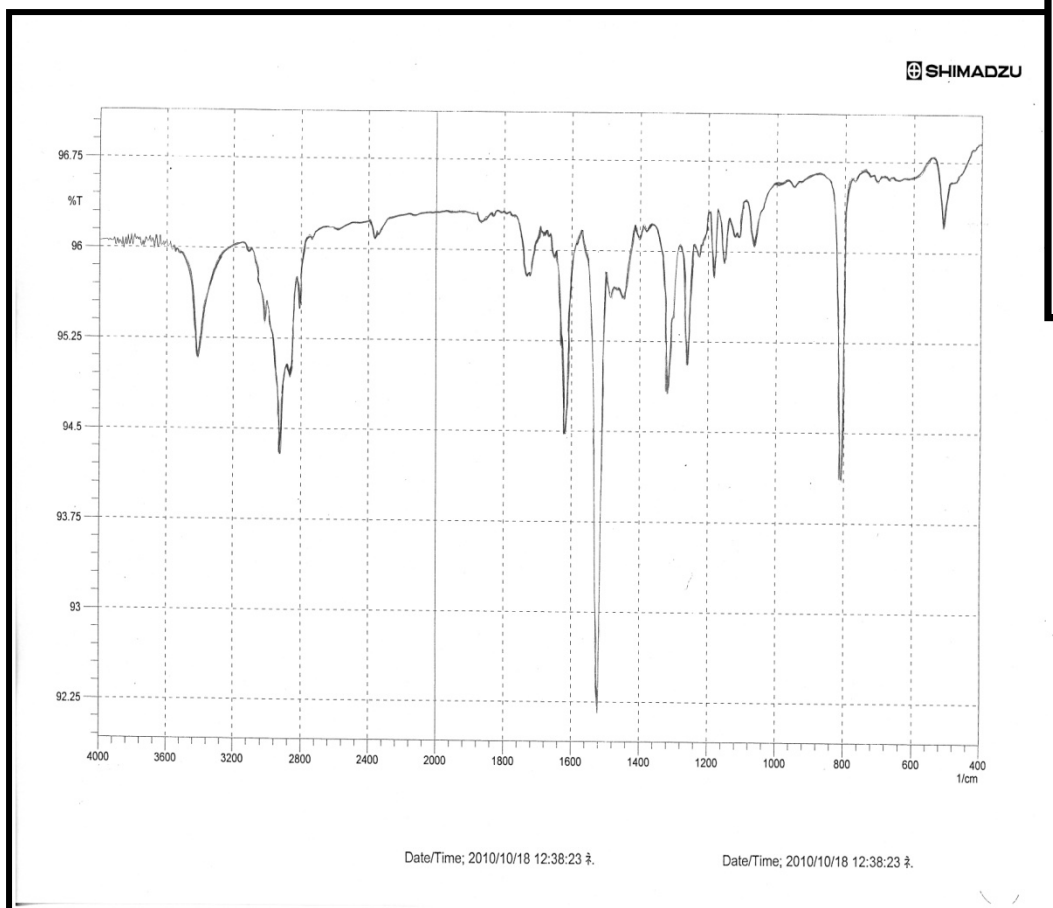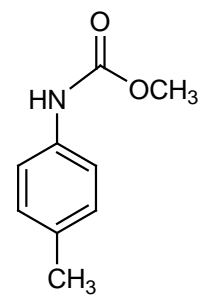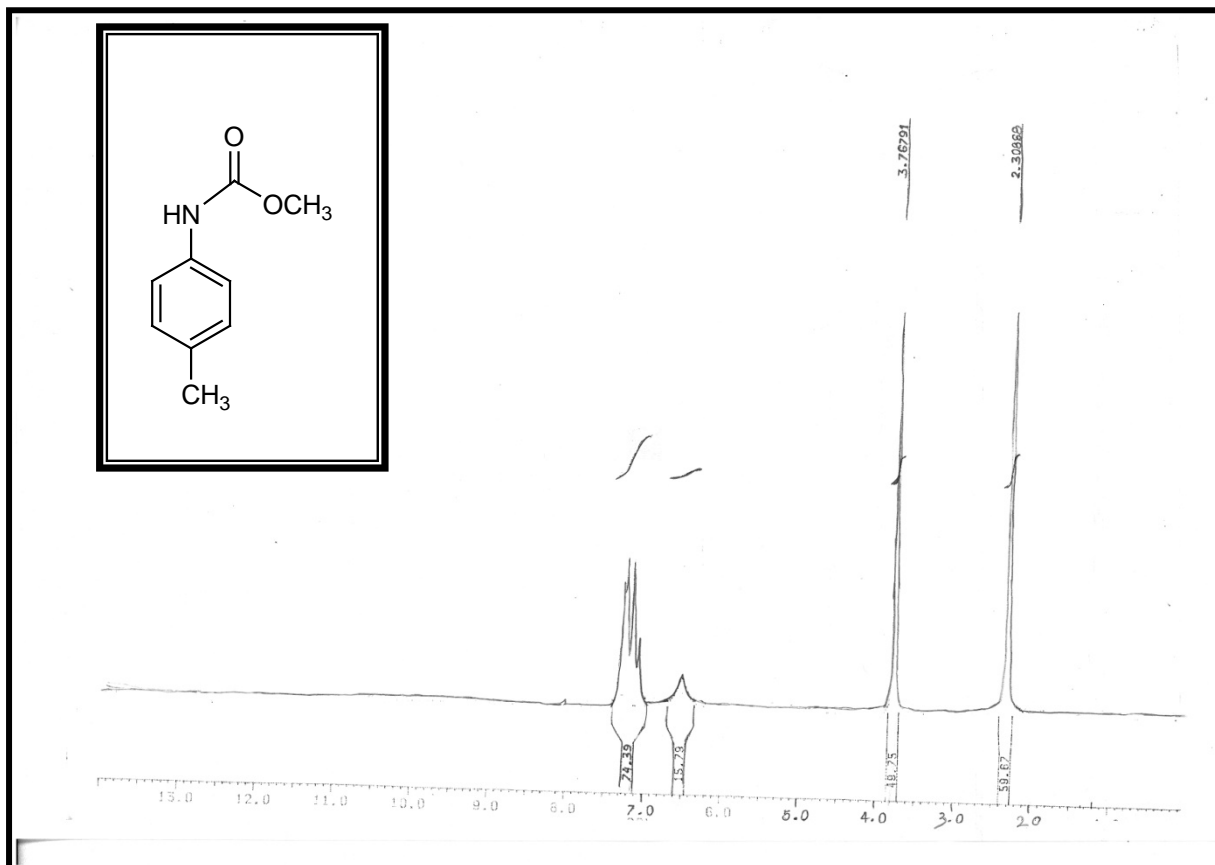

Supplement: Supplementary file 1 [file 4026691]
